# Supplementary material for: Mid-Pleistocene transition in glacial cycles explained by declining CO2 and regolith removal
Source: PubMed Central journal article supplement (PMC6447376; doi:10.1126/sciadv.aav7337), 2019-04-03
Supplement: aav7337_SM.pdf [file aav7337_SM.pdf]

## Supplementary Materials for

### **Mid-Pleistocene transition in glacial cycles explained by declining CO<sub>2</sub> and regolith removal**

M. Willeit\*, A. Ganopolski, R. Calov, V. Brovkin

\*Corresponding author. Email: willeit@pik-potsdam.de

Published 3 April 2019, *Sci. Adv.* **5**, eaav7337 (2019)  
DOI: 10.1126/sciadv.aav7337

#### **This PDF file includes:**

- Fig. S1. Time-splitting technique.
- Fig. S2. Volcanic CO<sub>2</sub> outgassing scenarios.
- Fig. S3. Regolith removal scenario.
- Fig. S4. Regolith scenarios.
- Fig. S5. Power spectra.
- Fig. S6. Comparison to additional observations and previous modeling results.
- Fig. S7. Transient simulations with present-day regolith and CO<sub>2</sub> outgassing.
- Fig. S8. Transient simulations with present-day CO<sub>2</sub> outgassing.
- Fig. S9. Transient simulations with present-day regolith.
- References (55–58)

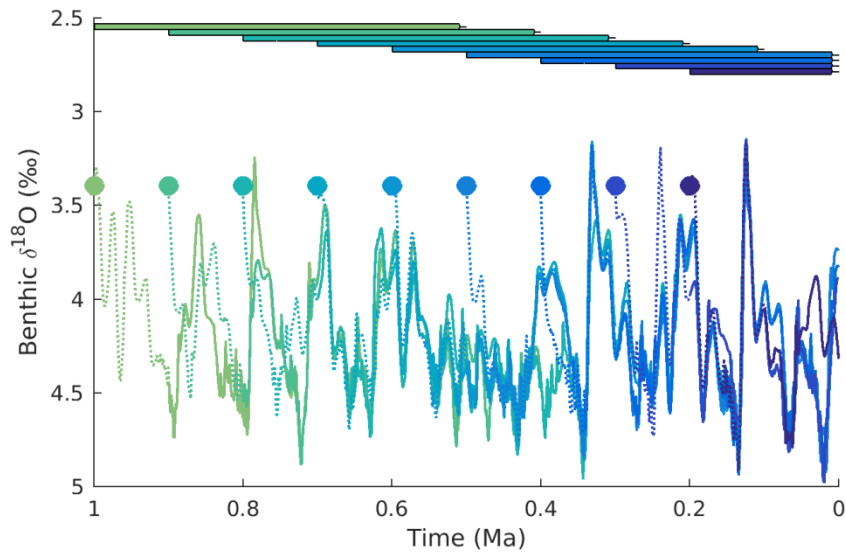

**Fig. S1. Time-splitting technique.** Illustration of the splitting in time technique for the last 1 Ma. Each model simulation initialized at different points in time, every 100,000 years, is 500,000 years long and is shown by a different color. The filled circles represent the initial points of the simulations. The first 100,000 years of each simulation, which are considered to be model spinup, are shown by the dotted lines.

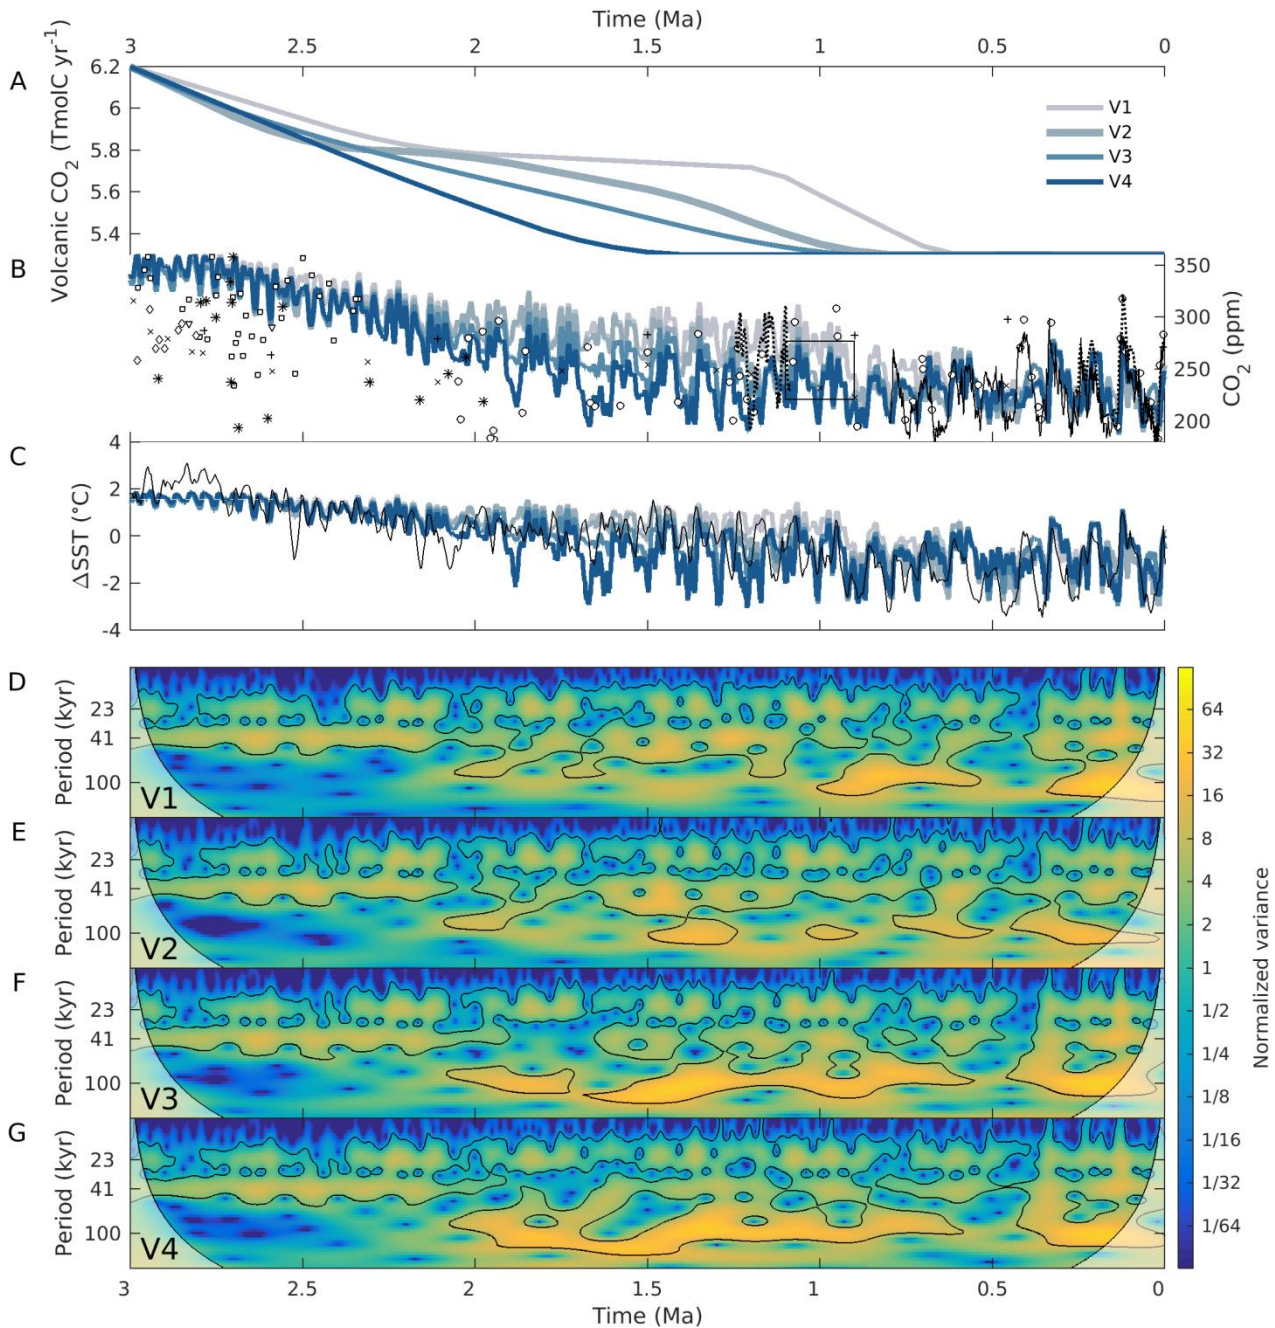

**Fig. S2. Volcanic CO<sub>2</sub> outgassing scenarios.** (A) Scenarios for the evolution of volcanic CO<sub>2</sub> outgassing and corresponding resulting modelled (B) atmospheric CO<sub>2</sub> and (C) sea surface temperature evolution (mean over the ensemble of simulations resulting from the time-splitting method). (D-G) Wavelet spectra of the modelled δ<sup>18</sup>O response for simulations with volcanic CO<sub>2</sub> outgassing scenarios V1-V4 as indicated in the panels. Here, the model simulations are with prescribed present-day regolith cover.

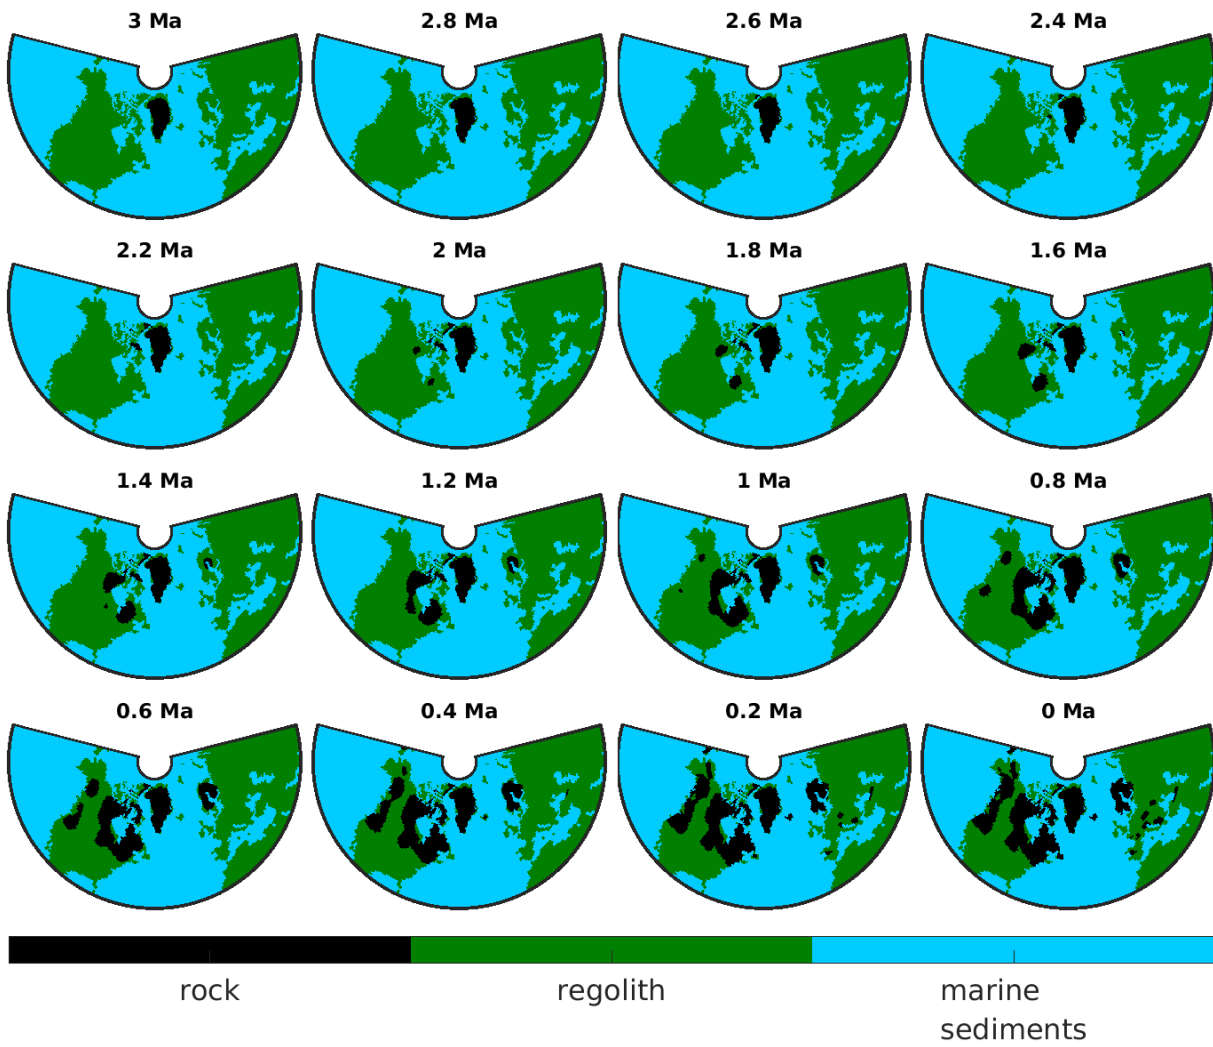

**Fig. S3. Regolith removal scenario.** 16 snapshots of the regolith cover mask prescribed in the model.

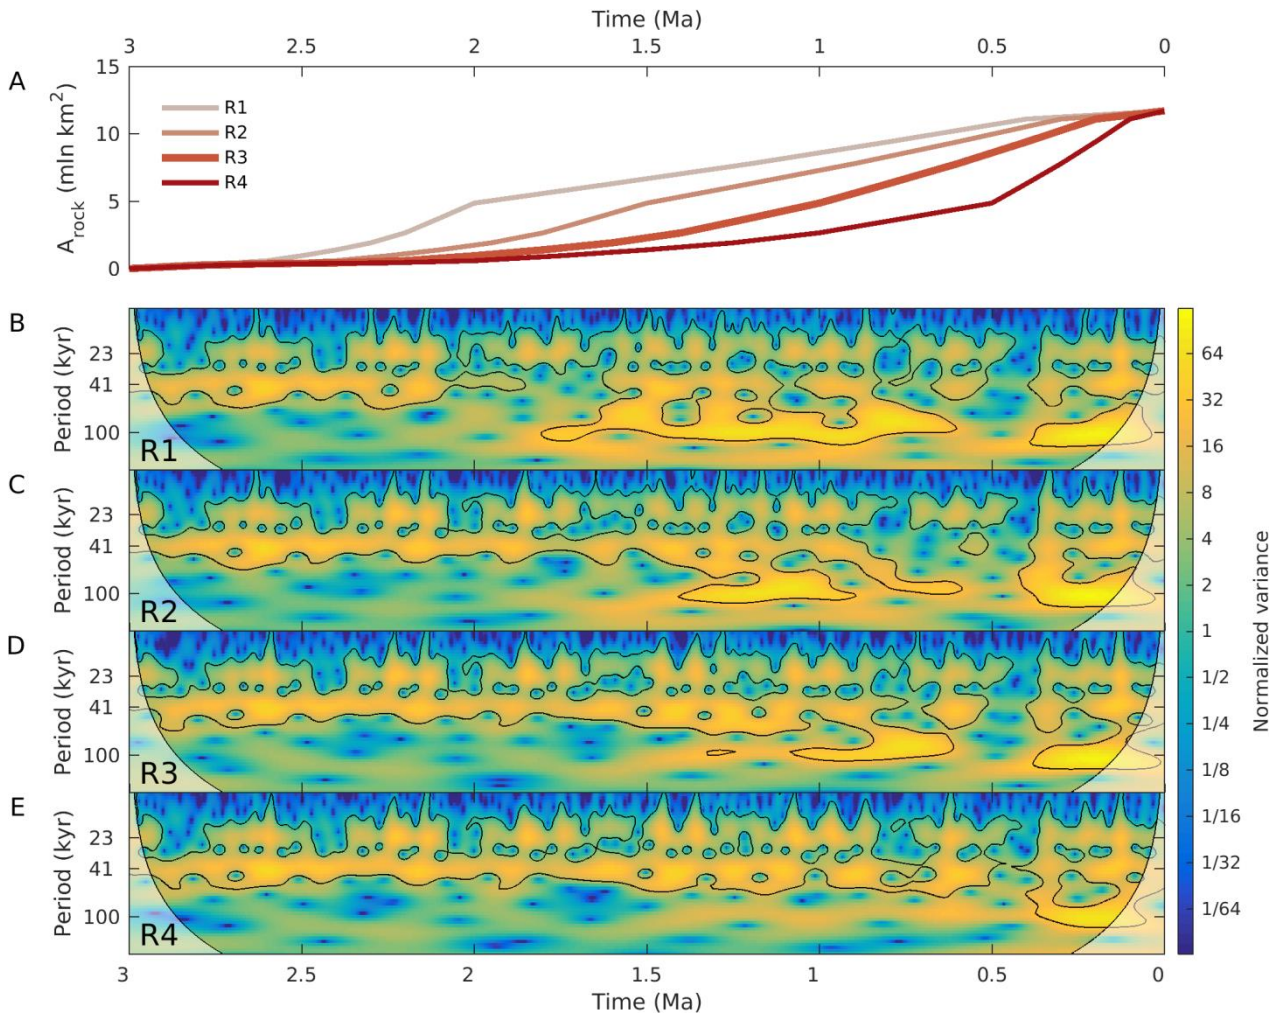

**Fig. S4. Regolith scenarios.** (A) Scenarios for the evolution of the continental (excluding Greenland) area of exposed crystalline bedrock resulting from the gradual removal of regolith by glacial erosion and (B-E) corresponding wavelet spectra of the modelled  $\delta^{18}\text{O}$  response for simulations with the regolith scenarios R1-R4 as indicated in the panels. Here, the model simulations are with prescribed present-day volcanic  $\text{CO}_2$  outgassing.

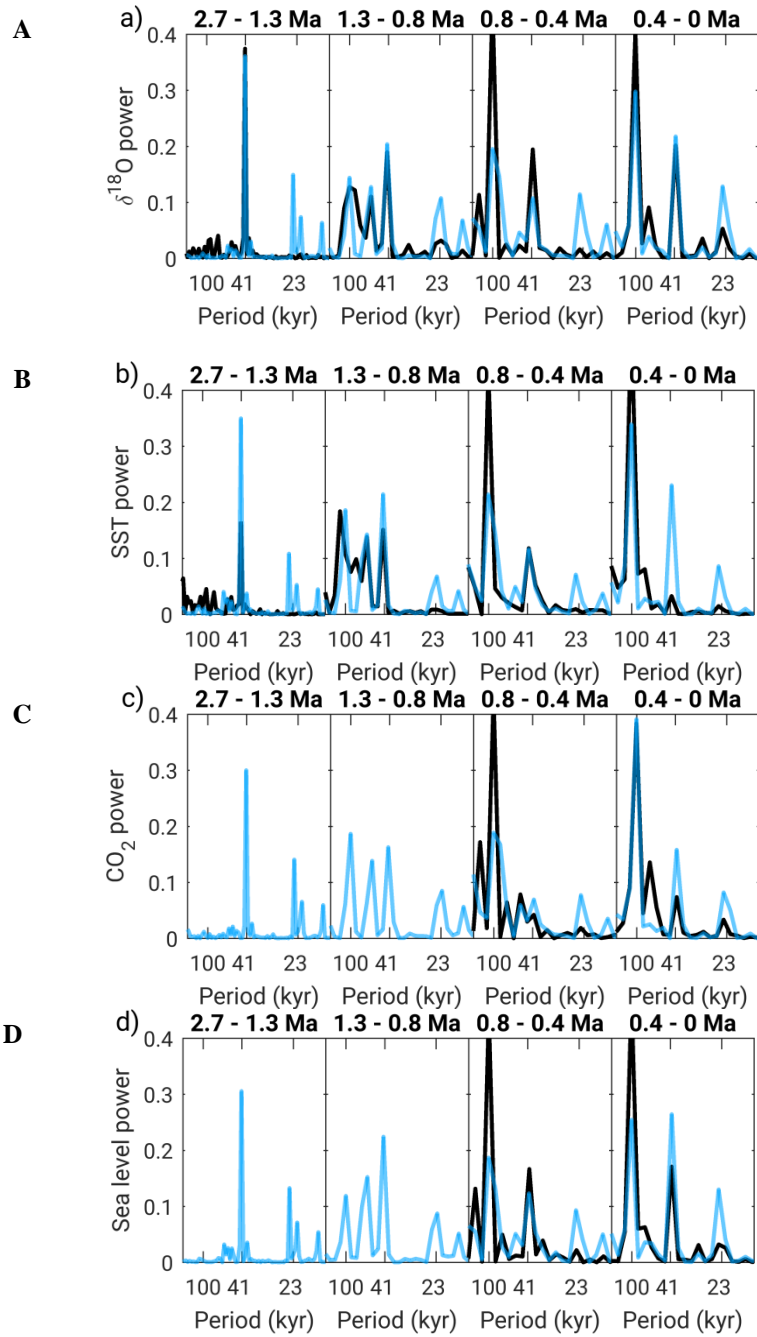

**Fig. S5. Power spectra.** Power spectra of (A)  $\delta^{18}\text{O}$ , (B) SST, (C)  $\text{CO}_2$  and (D) sea level for different intervals of time for the simulation with optimal  $\text{CO}_2$  outgassing and regolith removal scenarios (Fig. 1).

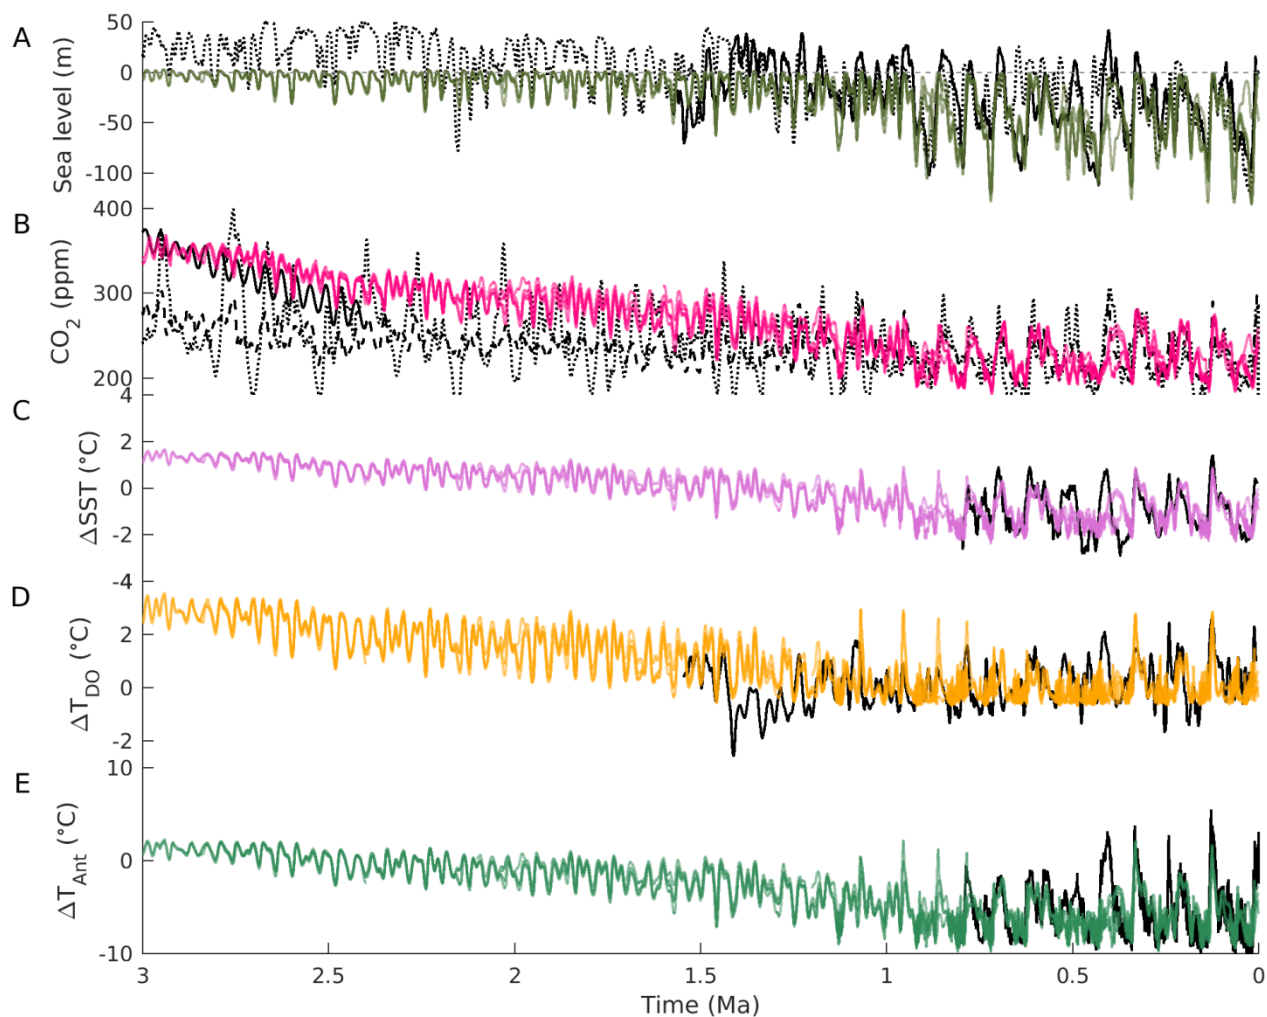

**Fig. S6. Comparison to additional observations and previous modeling results.** (A) Sea level compared to data from ref. (55) (solid black line) and ref. (56) (dotted black line). (B) CO<sub>2</sub> compared to previous modelling studies, ref. (1) (solid black line), ref. (31) (dotted black line) and ref. (32) (dotted black line). (C) Sea surface temperature compared to the stack of ref. (57). (D) Deep ocean temperature east of New Zealand compared to ref. (55). (E) Antarctic temperature compared to ice core proxy from ref. (58).

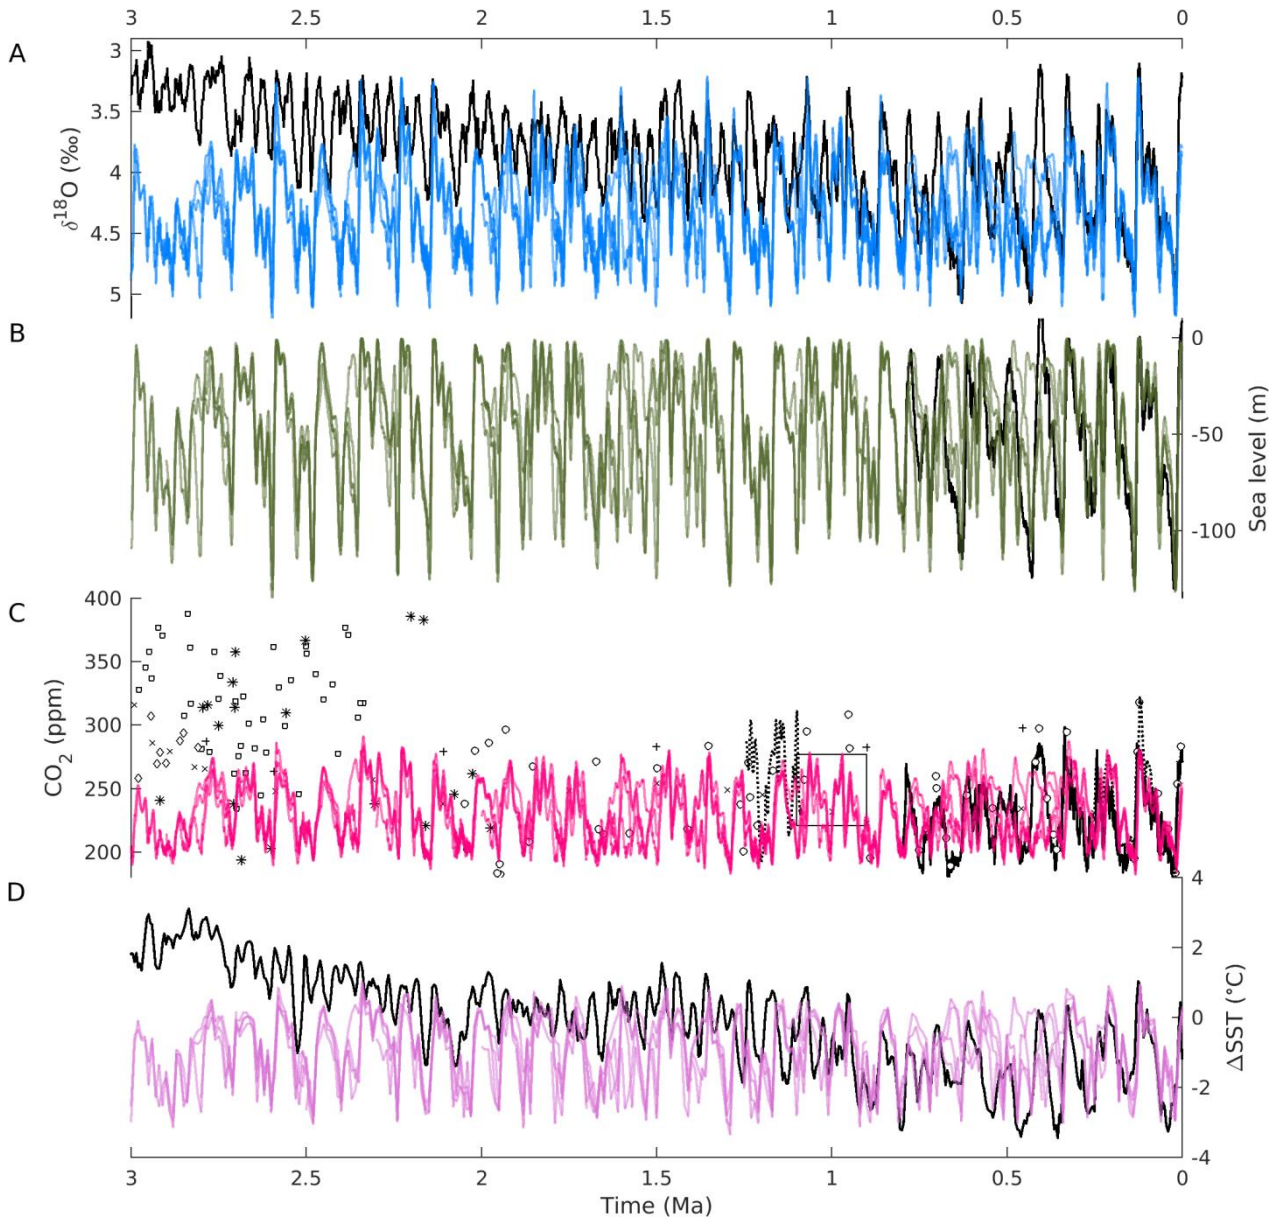

**Fig. S7. Transient simulations with present-day regolith and  $\text{CO}_2$  outgassing.** Same as panels A,B,D,E in Fig. 2 but for the simulations driven only by orbital forcing with prescribed present-day regolith mask and volcanic  $\text{CO}_2$  outgassing.



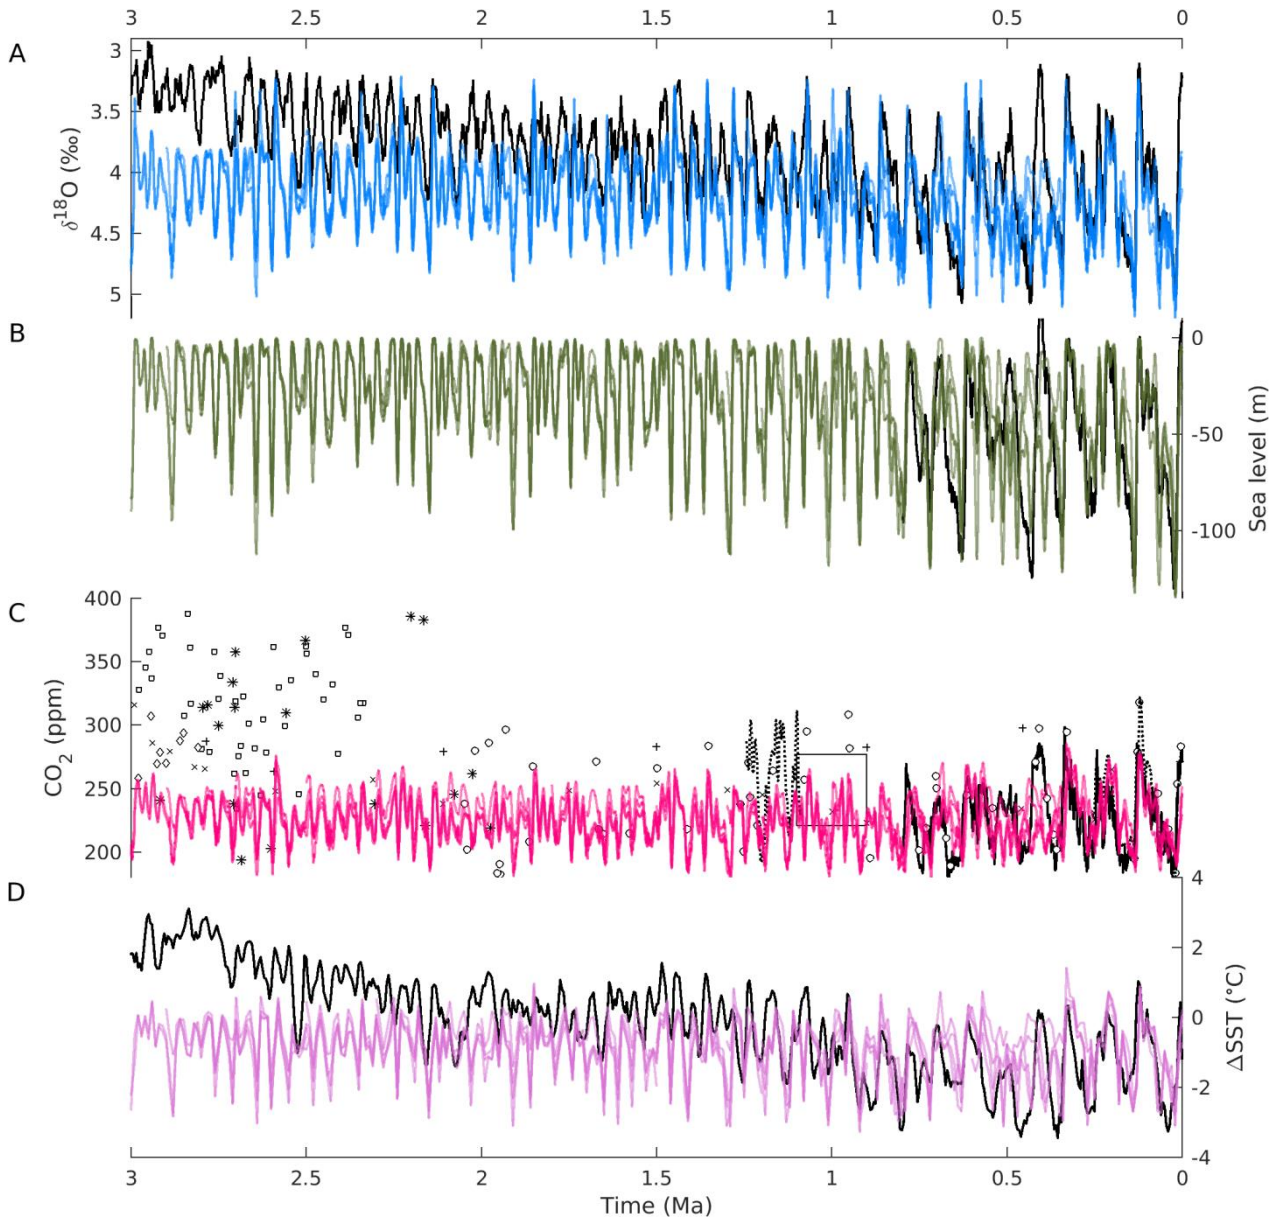

**Fig. S8. Transient simulations with present-day  $\text{CO}_2$  outgassing.** Same as panels A,B,D,E in Fig. 2 but for the simulations driven only by orbital forcing and optimal regolith removal scenario with prescribed present day volcanic  $\text{CO}_2$  outgassing.

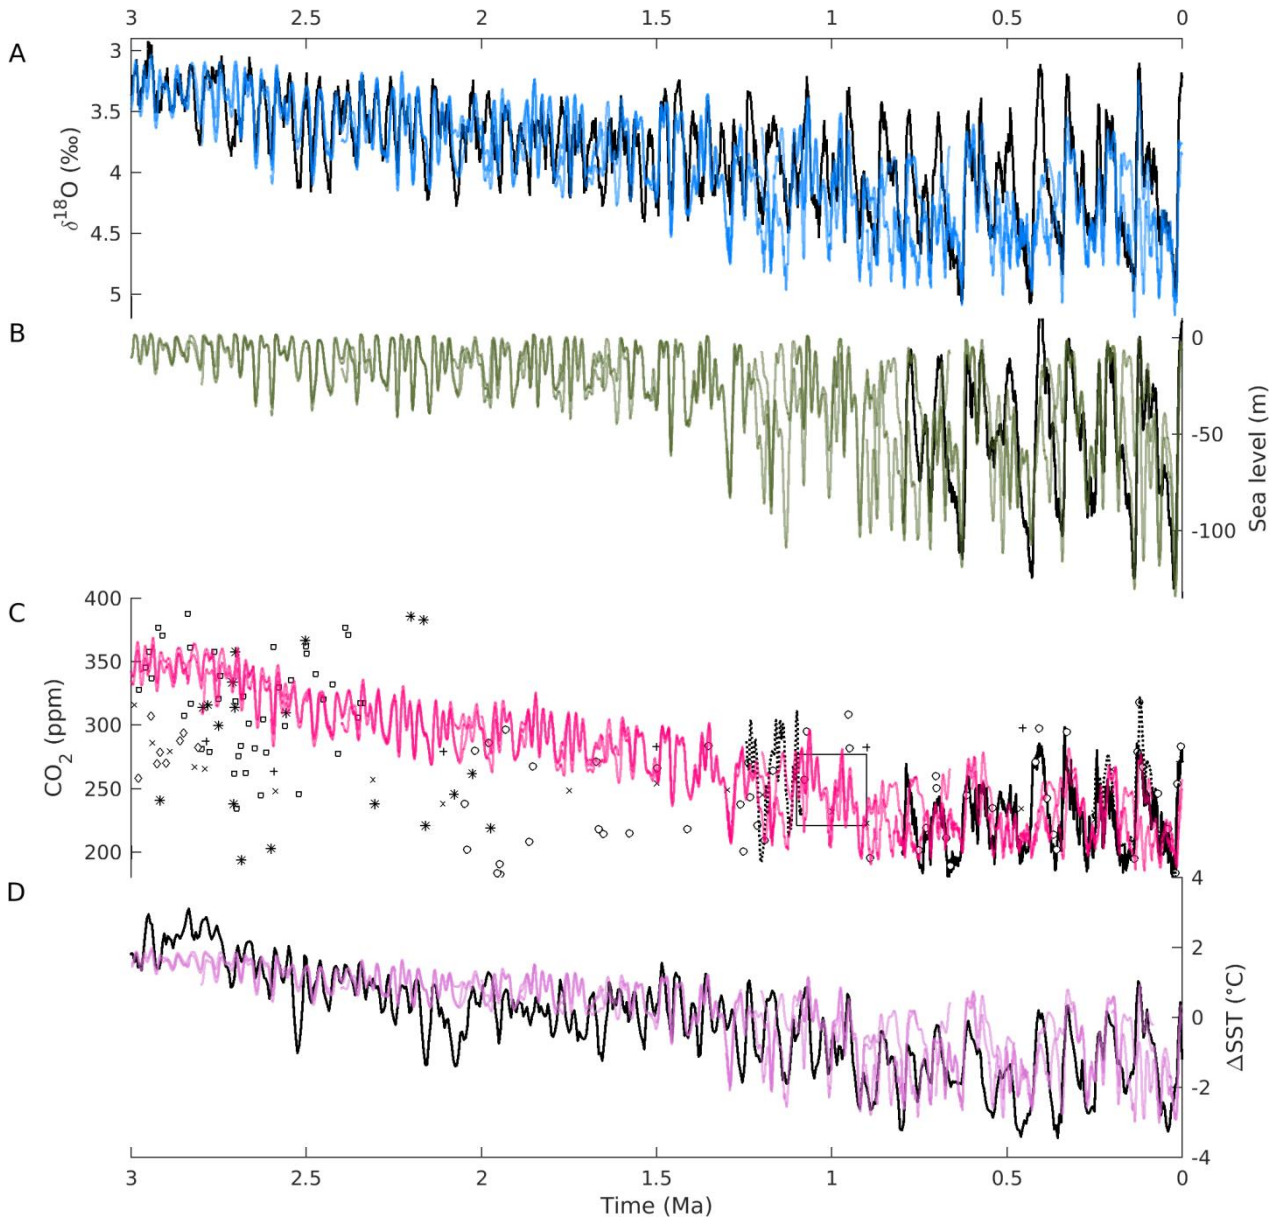

**Fig. S9. Transient simulations with present-day regolith.** Same as panels A,B,D,E in Fig. 2 but for the simulations driven only by orbital forcing and optimal volcanic  $\text{CO}_2$  outgassing scenario with prescribed present day regolith mask.
